# Supplementary material
Source: MDPI journal article supplement (https://www.mdpi.com/2673-7140/1/3/12)
Supplement: s1 [file s1]

Supplementary Table S1: Meteorological data during the field experiment.

| LJUBLJANA - BEŽIGRAD<br>lon=14.5124<br>lat=46.0655<br>altitude=299m | <i>Average<br/>day T [°C]</i> | <i>Max. T<br/>[°C]</i> | <i>Min. T<br/>[°C]</i> | <i>Average<br/>wind<br/>[m/s]</i> | <i>Cloudiness<br/>[%]</i> | <i>Average rel.<br/>humidity [%]</i> | <i>Rainfall<br/>[mm]</i> | <i>Duration<br/>of the sun<br/>[h]</i> |
|---------------------------------------------------------------------|-------------------------------|------------------------|------------------------|-----------------------------------|---------------------------|--------------------------------------|--------------------------|----------------------------------------|
| 2019-06-20                                                          | 22.3                          | 31                     | 16.1                   | 0.9                               | 40                        | 71                                   | 2.5                      | 11.9                                   |
| 2019-06-21                                                          | 22.6                          | 29.7                   | 15.6                   | 1.6                               | 47                        | 71                                   | 0                        | 9.7                                    |
| 2019-06-22                                                          | 20.2                          | 23.8                   | 17.7                   | 1                                 | 83                        | 85                                   | 0.4                      | 2.8                                    |
| 2019-06-23                                                          | 21.2                          | 25.7                   | 18                     | 0.6                               | 73                        | 80                                   | 32.7                     | 3.2                                    |
| 2019-06-24                                                          | 24.5                          | 29                     | 18                     | 0.5                               | 40                        | 69                                   | 1.3                      | 12.6                                   |
| 2019-06-25                                                          | 25.5                          | 30.6                   | 18.5                   | 0.8                               | 20                        | 68                                   | 0                        | 13.7                                   |
| 2019-06-26                                                          | 27                            | 32.8                   | 19.7                   | 1                                 | 3                         | 64                                   | 0                        | 14.3                                   |
| 2019-06-27                                                          | 29.1                          | 36.5                   | 20.5                   | 0.7                               | 13                        | 60                                   | 0                        | 13.8                                   |
| 2019-06-28                                                          | 25.6                          | 29.7                   | 23                     | 1.9                               | 17                        | 44                                   | 0                        | 14.2                                   |
| 2019-06-29                                                          | 24                            | 29.1                   | 16.7                   | 1.5                               | 7                         | 57                                   | 0                        | 14.5                                   |
| 2019-06-30                                                          | 25.9                          | 32.2                   | 15.3                   | 0.7                               | 23                        | 57                                   | 0                        | 14.2                                   |
| 2019-07-01                                                          | 27.4                          | 34.9                   | 17.5                   | 1.8                               | 27                        | 49                                   | 0                        | 14.2                                   |
| 2019-07-02                                                          | 23                            | 32.5                   | 17.8                   | 1.1                               | 40                        | 66                                   | 0                        | 10.1                                   |
| 2019-07-03                                                          | 21.2                          | 29.2                   | 17.7                   | 1.2                               | 73                        | 73                                   | 32.4                     | 8.5                                    |
| 2019-07-04                                                          | 21.1                          | 25                     | 17.8                   | 0.4                               | 60                        | 73                                   | 3.6                      | 5.7                                    |
| 2019-07-05                                                          | 24.5                          | 31.2                   | 14.8                   | 1.3                               | 37                        | 66                                   | 0                        | 11.5                                   |
| 2019-07-06                                                          | 26.6                          | 31.7                   | 18.9                   | 2.5                               | 40                        | 68                                   | 0                        | 12.1                                   |
| 2019-07-07                                                          | 21.8                          | 29.7                   | 17.5                   | 2.3                               | 80                        | 77                                   | 1.3                      | 7.3                                    |
| 2019-07-08                                                          | 19                            | 24.4                   | 16.4                   | 2.1                               | 87                        | 84                                   | 10.9                     | 4.5                                    |
| 2019-07-09                                                          | 18.7                          | 21.2                   | 16.3                   | 0.7                               | 100                       | 85                                   | 24.2                     | 1.7                                    |
| 2019-07-10                                                          | 18.5                          | 22.5                   | 16.1                   | 2.5                               | 53                        | 64                                   | 2.2                      | 11.3                                   |
| 2019-07-11                                                          | 20                            | 25                     | 11.4                   | 1.3                               | 80                        | 64                                   | 0                        | 9.3                                    |
| 2019-07-12                                                          | 20.1                          | 26.2                   | 16.5                   | 1.2                               | 80                        | 69                                   | 0.7                      | 6.7                                    |
| 2019-07-13                                                          | 20                            | 25.4                   | 15.4                   | 1.9                               | 63                        | 72                                   | 0                        | 8.6                                    |
| 2019-07-14                                                          | 19.3                          | 26                     | 13.1                   | 1.1                               | 47                        | 68                                   | 0                        | 10.5                                   |
| 2019-07-15                                                          | 20.1                          | 24.9                   | 15.4                   | 0.7                               | 60                        | 65                                   | 0.1                      | 9.2                                    |
| 2019-07-16                                                          | 21.1                          | 27.2                   | 12.8                   | 0.6                               | 20                        | 58                                   | 0                        | 14.1                                   |
| 2019-07-17                                                          | 22.8                          | 29.2                   | 13.5                   | 2.2                               | 57                        | 54                                   | 0                        | 13                                     |
| 2019-07-18                                                          | 21.4                          | 28.1                   | 16.6                   | 0.8                               | 73                        | 66                                   | 1.8                      | 5.8                                    |
| 2019-07-19                                                          | 23.2                          | 30.5                   | 16.2                   | 1.5                               | 40                        | 61                                   | 0.1                      | 13                                     |
| 2019-07-20                                                          | 24.9                          | 31                     | 14.5                   | 2.4                               | 13                        | 59                                   | 0                        | 13.7                                   |
| 2019-07-21                                                          | 24                            | 32.5                   | 19.1                   | 1.6                               | 57                        | 68                                   | 0                        | 7.9                                    |
| 2019-07-22                                                          | 25.2                          | 30.5                   | 19                     | 1.1                               | 50                        | 70                                   | 12.7                     | 9.8                                    |
| 2019-07-23                                                          | 27                            | 32.6                   | 18.7                   | 0.8                               | 10                        | 64                                   | 0                        | 14                                     |
| 2019-07-24                                                          | 28.1                          | 35.1                   | 19.8                   | 0.8                               | 30                        | 62                                   | 0                        | 12.1                                   |
| 2019-07-25                                                          | 28.3                          | 34.6                   | 21.8                   | 1.2                               | 27                        | 64                                   | 0                        | 10.2                                   |
| 2019-07-26                                                          | 27.8                          | 35                     | 22.1                   | 2.7                               | 57                        | 59                                   | 0                        | 11.8                                   |
| 2019-07-27                                                          | 25.2                          | 31.5                   | 20.6                   | 2.2                               | 80                        | 65                                   | 0.4                      | 7                                      |

|                   |      |      |      |     |    |    |      |      |
|-------------------|------|------|------|-----|----|----|------|------|
| <b>2019-07-28</b> | 18.4 | 23.6 | 17.6 | 1   | 90 | 92 | 10.8 | 0    |
| <b>2019-07-29</b> | 22.1 | 26.6 | 17.5 | 0.6 | 63 | 82 | 40.5 | 4.4  |
| <b>2019-07-30</b> | 24.6 | 31   | 18.1 | 1   | 57 | 72 | 0.1  | 6.6  |
| <b>2019-07-31</b> | 24.4 | 30.5 | 20   | 1.5 | 37 | 70 | 0    | 7.8  |
| <b>2019-08-01</b> | 24.5 | 29   | 20   | 1.6 | 47 | 67 | 0.3  | 10.9 |
| <b>2019-08-02</b> | 19.6 | 24.3 | 17.3 | 1.9 | 80 | 87 | 0    | 3.5  |
| <b>2019-08-03</b> | 19.8 | 27   | 15.3 | 0.7 | 67 | 78 | 63.4 | 7.5  |
| <b>2019-08-04</b> | 21   | 27.5 | 15.1 | 1.3 | 57 | 72 | 6.1  | 11.3 |
| <b>2019-08-05</b> | 23.5 | 29.1 | 15.6 | 1.7 | 37 | 66 | 0    | 11.9 |
| <b>2019-08-06</b> | 23.4 | 30.2 | 17.5 | 1.5 | 67 | 69 | 0    | 9.1  |
| <b>2019-08-07</b> | 25   | 30   | 19.3 | 1.4 | 60 | 71 | 1.7  | 9.9  |
| <b>2019-08-08</b> | 20.8 | 24.9 | 20.4 | 1.3 | 87 | 85 | 0    | 0.6  |
| <b>2019-08-09</b> | 24.9 | 31.1 | 18.2 | 0.9 | 43 | 74 | 1.9  | 10.9 |
| <b>2019-08-10</b> | 26.4 | 32.2 | 19   | 2.4 | 57 | 72 | 0    | 11   |
| <b>2019-08-11</b> | 24.7 | 28.7 | 22.1 | 0.9 | 40 | 71 | 0    | 7.2  |
| <b>2019-08-12</b> | 26.7 | 34.1 | 18.5 | 0.6 | 30 | 67 | 0    | 11.2 |
| <b>2019-08-13</b> | 21.7 | 26.7 | 19   | 4.6 | 90 | 77 | 0    | 0.1  |

Source:

<https://meteo.arso.gov.si/met/sl/app/webmet/#webmet==8Sdx2bhR2cv0WZ0V2bvEGcw9ydIJWblR3LwVnaz9SYtVmYh9icIFGbt9SaulGdugXbsx3cs9mdl5WahxXYyNGapZXZ8tHZv1WYp5mOnMHbvZXZuIWYnwCchJXYtVGdJnOn0UQQdSf;>
